# Supplementary material for: Heat-Killed Lactobacilli Preparations Promote Healing in the Experimental Cutaneous Wounds
Source: MDPI journal article supplement (doi:10.3390/cells10113264), 2021-11-22
Supplement: s1 [file s1]

## Supporting Information

**Table S1. The induction of collagen secretion by Hs68 cells with different Lactobacilli.**

| Species                    | Strain                      | mean $\pm$ SEM <sup>a</sup>       |
|----------------------------|-----------------------------|-----------------------------------|
| <i>L. acidophilus</i>      | BCRC910774                  | 2.79 $\pm$ 0.13                   |
| <i>L. acidiophilus</i>     | GMNL-631                    | 3.33 $\pm$ 0.10                   |
| <i>L. helveticus</i>       | GMNL-440                    | 5.45 $\pm$ 0.04                   |
| <i>L. fermentum</i>        | BCRC910259                  | 4.28 $\pm$ 0.09                   |
| <i>L. fermentum</i>        | GMNL-297                    | 3.61 $\pm$ 0.22                   |
| <i>L. fermentum</i>        | GMNL-299                    | 3.93 $\pm$ 0.03                   |
| <i>L. casei</i>            | BCRC910585                  | 3.00 $\pm$ 0.23                   |
| <i>L. paracasei</i>        | BCRC910220                  | 4.61 $\pm$ 0.15                   |
| <i>L. paracasei</i>        | BCRC910314                  | 5.32 $\pm$ 0.39                   |
| <b><i>L. paracasei</i></b> | <b>GMNL-653, BCRC910721</b> | <b>5.99 <math>\pm</math> 0.02</b> |
| <b><i>L. plantarum</i></b> | <b>GMNL-6, BCRC910777</b>   | <b>9.39 <math>\pm</math> 0.27</b> |
| <i>L. plantarum</i>        | BCRC911066                  | 2.11 $\pm$ 0.01                   |
| <i>L. pentosus</i>         | BCRC910591                  | 3.70 $\pm$ 0.10                   |
| <i>L. latiss</i>           | GMNL-480                    | 3.82 $\pm$ 0.04                   |

<sup>a</sup> Data were presented as fold change compared with vehicle control.

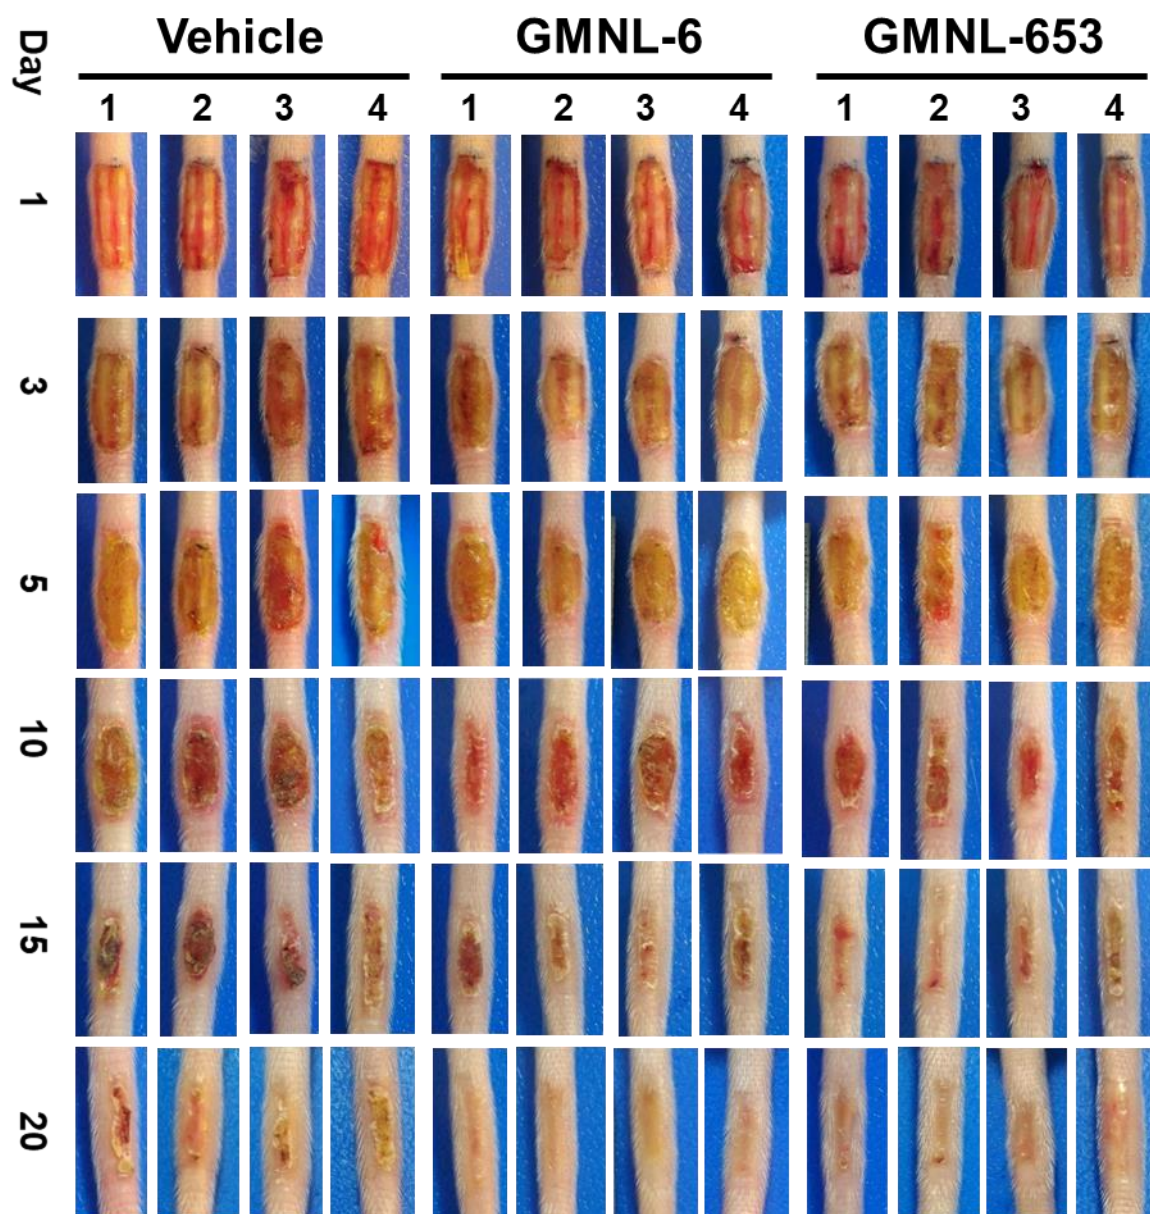

**Figure S1.** The images of tail wounds from each mouse used for analyzing the beneficial effects of heat-killed GMNL-6- or GMNL-653-containing gels.

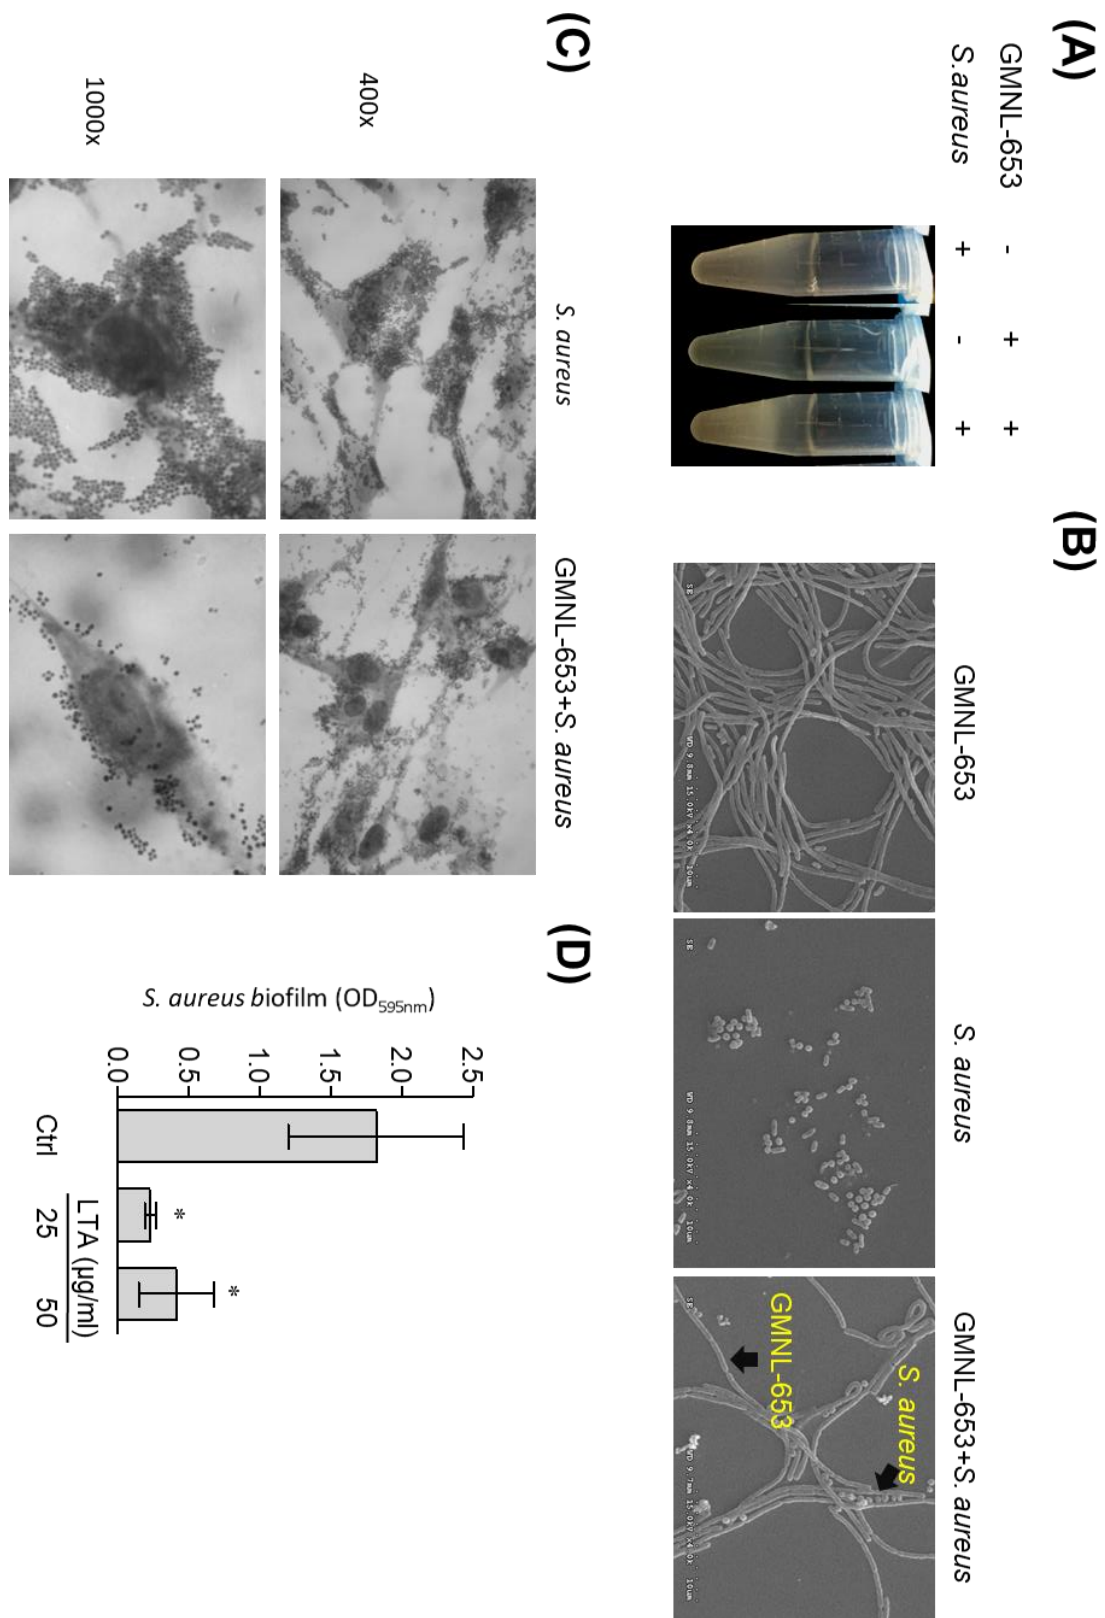

**Figure S2. Heat-killed GMNL-653 decreases the adherence of *S. aureus* to Hs68 cells through the induction of aggregation.** (A) The tube test of aggregation by directly mixing and observing the formation of precipitates. (B) The SEM data of

aggregates of heat-killed GNML-653 bacterial bodies and live *S. aureus* cells. (C) The live *S. aureus* or the mixture of heat-killed GMNL-653 and live *S. aureus* (1:1) were added into microwells with Hs68 cells for 24 hours followed by observing under microscopy. (D) *S. aureus* were seeded into wells of 96-well-plate with or without the indicated concentration of GMNL-653 derived LTA for 24 hours and the wells were washed with PBS. The biofilm was visualized by staining with 0.1% crystal violet, dissolved with DMSO, and quantified by the absorbance at a wavelength of 590 nm. \*,  $p < 0.05$ .
